# Supplementary material
Source: PubMed Central journal article supplement (PMC6638399)
Supplement: MPP-16-811-s007.pdf [file MPP-16-811-s007.pdf]

**Table S6. Validation of microarray data by qRT-PCR**

| <b>Gene Identifier</b> | <b>Annotation</b>                                                     |
|------------------------|-----------------------------------------------------------------------|
| LOC_Os11g41680         | Cytochrome P450 71D10                                                 |
| LOC_Os04g48930         | Ferric-chelate reductase                                              |
| LOC_Os09g36680         | Ribonuclease 3 precursor                                              |
| LOC_Os07g48050         | Peroxidase precursor                                                  |
| LOC_Os04g09900         | Ent-kaurene synthase A, chloroplast precursor                         |
| LOC_Os10g21670         | Dehydration stress-induced protein                                    |
| LOC_Os09g23530         | Aryl-alcohol dehydrogenase                                            |
| LOC_Os08g44270         | Vignain precursor                                                     |
| LOC_Os08g36480         | Nitrate reductase 1                                                   |
| LOC_Os02g52730         | Ferredoxin--nitrite reductase, chloroplast precursor                  |
| LOC_Os03g01290         | Nitrate transporter (NRT1.1C)                                         |
| LOC_Os01g37590         | Nitrate transporter (NRT1.4)                                          |
| LOC_Os03g56869         | Ribose-5-phosphate isomerase A                                        |
| LOC_Os12g17600         | Ribulose biphosphate carboxylase small chain C, chloroplast precursor |
| LOC_Os10g37180         | Glycine decarboxylase, mitochondrial precursor                        |

| <b>Gene ontology</b>         | <b>log2 microarray (Si,m vs Ctrl,m)</b> | <b>log2 qRT-PCR (Si,m vs Ctrl,m)</b> |
|------------------------------|-----------------------------------------|--------------------------------------|
| Oxidation-reduction process  | 4,97                                    | 2,18                                 |
| Iron assimilation            | 4,12                                    | 2,35                                 |
| RNA binding                  | 3,68                                    | 3,02                                 |
| Response to oxidative stress | -1,84                                   | -0,58                                |
| Metabolic process            | -5,28                                   | -5,85                                |
| Unclassified                 | -5,97                                   | -7,11                                |
| Metabolic process            | 0,00                                    | 0,43                                 |
| Proteolysis                  | 0,01                                    | 0,03                                 |
| Nitrogen metabolism          | 1,61                                    | 1,67                                 |
| Nitrogen metabolism          | 1,73                                    | 1,60                                 |
| Nitrogen assimilation        | 3,57                                    | 3,76                                 |
| Nitrogen assimilation        | 1,99                                    | 1,55                                 |
| Photorespiration             | 2,02                                    | 1,38                                 |
| Photorespiration             | 1,73                                    | 1,27                                 |
| Photorespiration             | 2,03                                    | 1,16                                 |
